# Supplementary material for: Defining the Boundaries of Normal Thrombin Generation: Investigations into Hemostasis
Source: PubMed Central journal article supplement (PMC3271084; doi:10.1371/journal.pone.0030385), 2012-02-02

FIGURE S3.

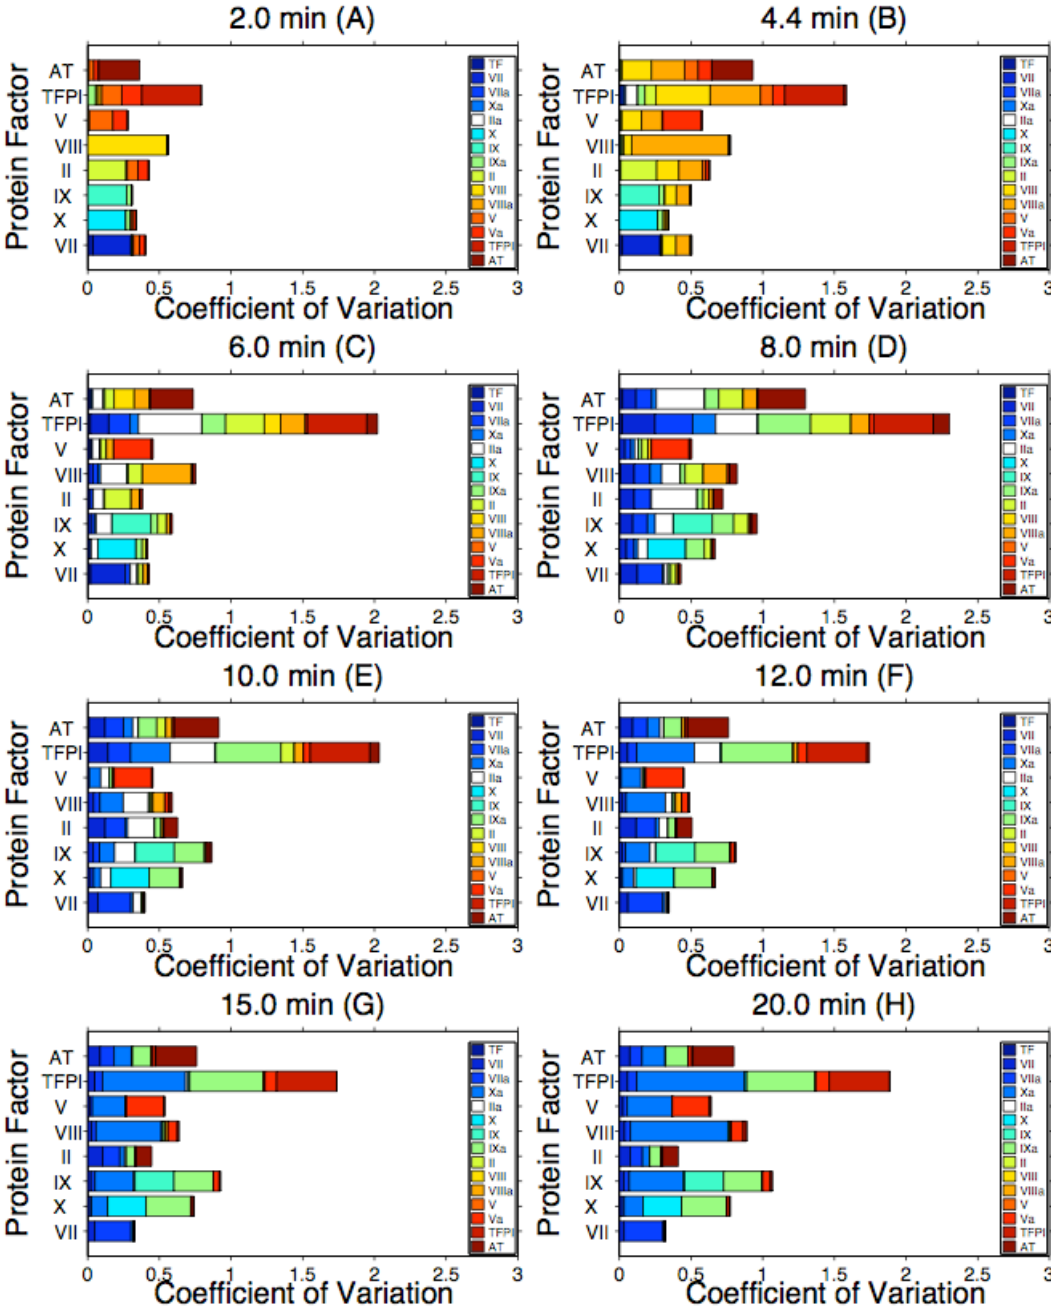

Supplement: pone.0030385.s003.pdf [file pone.0030385.s003.pdf]
