# Supplementary material for: Defining the Boundaries of Normal Thrombin Generation: Investigations into Hemostasis
Source: PubMed Central journal article supplement (PMC3271084; doi:10.1371/journal.pone.0030385), 2012-02-02
Supplement: pone.0030385.s004.pdf [file pone.0030385.s004.pdf]

## SUPPLEMENT

**TABLE S1:** Ordinary differential equations comprising the model.

$$\frac{d[TF]}{dt} = -k_2[TF][VII] + k_1[TF = VII] - k_4[TF][VIIa] + k_3[TF = VIIa] \quad (1)$$

$$\frac{d[VII]}{dt} = -k_2[TF][VII] + k_1[TF = VII] - k_5[TF = VIIa][VII] - k_6[Xa][VII] - k_7[IIa][VII] \quad (2)$$

$$\frac{d[TF = VII]}{dt} = -k_1[TF = VII] + k_2[TF][VII] \quad (3)$$

$$\frac{d[VIIa]}{dt} = -k_4[TF][VIIa] + k_3[TF = VIIa] + k_5[TF = VIIa][VII] + k_6[Xa][VII] + k_7[IIa][VII] \quad (4)$$

$$\begin{aligned} \frac{d[TF = VIIa]}{dt} = & -k_3[TF = VIIa] + k_4[TF][VIIa] - k_9[TF = VIIa][X] + k_8[TF = VIIa = X] - k_{12}[TF = VIIa][Xa] + k_{11}[TF = VIIa = Xa] \\ & - k_{14}[TF = VIIa][IX] + k_{13}[TF = VIIa = IX] + k_{15}[TF = VIIa = IX] - k_{37}[TF = VIIa][Xa = TFPI] - k_{42}[TF = VIIa][AT] \end{aligned} \quad (5)$$

$$\begin{aligned} \frac{d[Xa]}{dt} = & -k_{12}[TF = VIIa][Xa] + k_{11}[TF = VIIa = Xa] + k_{22}[IXa = VIIa = X] - k_{28}[Xa][Va] + k_{27}[Xa = Va] - k_{34}[Xa][TFPI] \\ & + k_{33}[Xa = TFPI] - k_{38}[Xa][AT] + k_{43}[IXa][X] \end{aligned} \quad (6)$$

$$\frac{d[IIa]}{dt} = k_{16}[Xa][II] + k_{32}[mIIa][Xa = Va] - k_{41}[IIa][AT] \quad (7)$$

$$\frac{d[X]}{dt} = -k_9[TF = VIIa][X] + k_8[TF = VIIa = X] - k_{21}[IXa = VIIa][X] + k_{20}[IXa = VIIa = X] + k_{25}[IXa = VIIa = X] - k_{43}[IXa][X] \quad (8)$$

$$\frac{d[TF = VIIa = X]}{dt} = k_9[TF = VIIa][X] - k_{10}[TF = VIIa = X] - k_8[TF = VIIa = X] \quad (9)$$

$$\frac{d[TF = VIIa = Xa]}{dt} = k_{10}[TF = VIIa = X] + k_{12}[TF = VIIa][Xa] - k_{11}[TF = VIIa = Xa] - k_{36}[TF = VIIa = Xa][TFPI] + k_{35}[TF = VIIa = Xa = TFPI] \quad (10)$$

$$\frac{d[IX]}{dt} = -k_{14}[TF = VIIa][IX] + k_{13}[TF = VIIa = IX] \quad (11)$$

$$\frac{d[TF = VIIa = IX]}{dt} = k_{14}[TF = VIIa][IX] - k_{13}[TF = VIIa = IX] - k_{15}[TF = VIIa = IX] \quad (12)$$

$$\frac{d[IXa]}{dt} = k_{15}[TF = VIIa = IX] - k_{19}[VIIIa][IXa] + k_{18}[IXa = VIIIa] + k_{25}[IXa = VIIIa = X] + k_{25}[IXa = VIIIa] - k_{40}[IXa][AT] \quad (13)$$

$$\frac{d[II]}{dt} = -k_{16}[Xa][II] - k_{30}[Xa = Va][II] + k_{29}[Xa = Va = II] \quad (14)$$

$$\frac{d[VIII]}{dt} = -k_{17}[IIa][VIII] \quad (15)$$

$$\frac{d[VIIIa]}{dt} = k_{17}[IIa][VIII] - k_{19}[VIIIa][IXa] + k_{18}[IXa = VIIIa] - k_{24}[VIIIa] + k_{23}[VIII.lca1][VIII.a2] \quad (16)$$

$$\frac{d[IXa = VIIIa]}{dt} = k_{19}[VIIIa][IXa] - k_{18}[IXa = VIIIa] - k_{21}[IXa = VIIIa][X] + k_{20}[IXa = VIIIa = X] + k_{22}[IXa = VIIIa = X] - k_{25}[IXa = VIIIa] \quad (17)$$

$$\frac{d[IXa = VIIIa = X]}{dt} = k_{21}[IXa = VIIIa][X] - k_{20}[IXa = VIIIa = X] - k_{22}[IXa = VIIIa = X] - k_{25}[IXa = VIIIa = X] \quad (18)$$

$$\frac{d[VIII.lca1]}{dt} = k_{24}[VIIIa] + k_{25}[IXa = VIIIa = X] + k_{25}[IXa = VIIIa] - k_{23}[VIII.lca1][VIII.a2] \quad (19)$$

$$\frac{d[VIII.a2]}{dt} = k_{24}[VIIIa] + k_{25}[IXa = VIIIa = X] + k_{25}[IXa = VIIIa] - k_{23}[VIII.lca1][VIII.a2] \quad (20)$$

$$\frac{d[V]}{dt} = -k_{26}[IIa][V] - k_{44}[mIIa][V] \quad (21)$$

$$\frac{d[Va]}{dt} = k_{26}[IIa][V] - k_{28}[Xa][Va] + k_{27}[Xa = Va] + k_{44}[mIIa][V] \quad (22)$$

$$\frac{d[Xa = Va]}{dt} = k_{28}[Xa][Va] - k_{27}[Xa = Va] - k_{30}[Xa = Va][II] + k_{29}[Xa = Va = II] + k_{31}[Xa = Va = II] \quad (23)$$

$$\frac{d[Xa = Va = II]}{dt} = k_{30}[Xa = Va][II] - k_{29}[Xa = Va = II] - k_{31}[Xa = Va = II] \quad (24)$$

$$\frac{d[mIIa]}{dt} = k_{31}[Xa = Va = II] - k_{32}[mIIa][Xa = Va] - k_{39}[mIIa][AT] \quad (25)$$

$$\frac{d[TFPI]}{dt} = -k_{34}[Xa][TFPI] + k_{33}[Xa = TFPI] - k_{36}[TF = VIIa = Xa][TFPI] + k_{35}[TF = VIIa = Xa = TFPI] \quad (26)$$

$$\frac{d[Xa = TFPI]}{dt} = k_{34}[Xa][TFPI] - k_{33}[Xa = TFPI] - k_{37}[TF = VIIa][Xa = TFPI] \quad (27)$$

$$\frac{d[TF = VIIa = Xa = TFPI]}{dt} = k_{36}[TF = VIIa = Xa][TFPI] - k_{35}[TF = VIIa = Xa = TFPI] + k_{37}[TF = VIIa][Xa = TFPI] \quad (28)$$

$$\frac{d[AT]}{dt} = -k_{38}[Xa][AT] - k_{39}[mIIa][AT] - k_{40}[IXa][AT] - k_{41}[IIa][AT] - k_{42}[TF = VIIa][AT] \quad (29)$$

$$\frac{d[Xa = AT]}{dt} = k_{38}[Xa][AT] \quad (30)$$

$$\frac{d[mIIa = AT]}{dt} = k_{39}[mIIa][AT] \quad (31)$$

$$\frac{d[IXa = AT]}{dt} = k_{40}[IXa][AT] \quad (32)$$

$$\frac{d[IIa = AT]}{dt} = k_{41}[IIa][AT] \quad (33)$$

$$\frac{d[TF = VIIa = AT]}{dt} = k_{42}[TF = VIIa][AT] \quad (34)$$
