# Supplementary material for: Defining the Boundaries of Normal Thrombin Generation: Investigations into Hemostasis
Source: PubMed Central journal article supplement (PMC3271084; doi:10.1371/journal.pone.0030385), 2012-02-02
Supplement: pone.0030385.s005.pdf [file pone.0030385.s005.pdf]

**Table S2:** Typical initial coagulation factor concentrations and their normal ranges.

| <b>Protein Factor</b> | <b>Variable</b> | <b>Initial Concentration (M)</b> | <b>Normal Range* (%)</b> | <b>LETS Population Range# (%)</b> | <b>In house Population‡ (%)</b> |
|-----------------------|-----------------|----------------------------------|--------------------------|-----------------------------------|---------------------------------|
| TF                    | $x_1$           | $5 \times 10^{-12}$              | Undefined                | Undefined                         | Undefined                       |
| VII                   | $x_2$           | $1 \times 10^{-8}$               | 60 – 140                 | 41 –171                           | 76-147                          |
| TF=VII                | $x_3$           | 0                                |                          |                                   |                                 |
| VIIa                  | $x_4$           | $1 \times 10^{-10}$              | 60 – 140                 |                                   |                                 |
| TF=VIIa               | $x_5$           | 0                                |                          |                                   |                                 |
| Xa                    | $x_6$           | 0                                |                          |                                   |                                 |
| IIa                   | $x_7$           | 0                                |                          |                                   |                                 |
| X                     | $x_8$           | $1.6 \times 10^{-7}$             | 60 – 140                 | 46 –163                           | 83-184                          |
| TF=VIIa=X             | $x_9$           | 0                                |                          |                                   |                                 |
| TF=VIIa=Xa            | $x_{10}$        | 0                                |                          |                                   |                                 |
| IX                    | $x_{11}$        | $9 \times 10^{-8}$               | 69 – 151                 | 52 –188                           | 74-151                          |
| TF=VIIa=IX            | $x_{12}$        | 0                                |                          |                                   |                                 |
| IXa                   | $x_{13}$        | 0                                |                          |                                   |                                 |
| II                    | $x_{14}$        | $1.4 \times 10^{-6}$             | 60 – 140                 | 55 –153                           | 89-152                          |
| VIII                  | $x_{15}$        | $7 \times 10^{-10}$              | 64 – 232                 | 49 –232                           | 99-193                          |
| VIIIa                 | $x_{16}$        | 0                                |                          |                                   |                                 |
| IXa=VIIIa             | $x_{17}$        | 0                                |                          |                                   |                                 |
| IXa=VIIIa=X           | $x_{18}$        | 0                                |                          |                                   |                                 |
| VIII.1ca1             | $x_{19}$        | 0                                |                          |                                   |                                 |
| VIII.a2               | $x_{20}$        | 0                                |                          |                                   |                                 |
| V                     | $x_{21}$        | $2 \times 10^{-8}$               | 60 – 140                 | 47 – 302                          | 86-138                          |
| Va                    | $x_{22}$        | 0                                |                          |                                   |                                 |
| Xa=Va                 | $x_{23}$        | 0                                |                          |                                   |                                 |
| Xa=Va=II              | $x_{24}$        | 0                                |                          |                                   |                                 |
| mIIa                  | $x_{25}$        | 0                                |                          |                                   |                                 |
| TFPI                  | $x_{26}$        | $2.5 \times 10^{-9}$             | 46 – 171                 | 46 –170                           | 88-148                          |
| Xa=TFPI               | $x_{27}$        | 0                                |                          |                                   |                                 |
| TF=VIIa=Xa=TFPI       | $x_{28}$        | 0                                |                          |                                   |                                 |
| AT                    | $x_{29}$        | $3.4 \times 10^{-6}$             | 88 – 174                 | 63 –125                           | 74-131                          |
| Xa=AT                 | $x_{30}$        | 0                                |                          |                                   |                                 |
| mIIa=AT               | $x_{31}$        | 0                                |                          |                                   |                                 |
| IXa=AT                | $x_{32}$        | 0                                |                          |                                   |                                 |
| IIa=At                | $x_{33}$        | 0                                |                          |                                   |                                 |
| TF=VIIa=AT            | $x_{34}$        | 0                                |                          |                                   |                                 |

\*: The normal ranges (Reference Intervals) were determined in 2006/2007 by The Fletcher Allen Health Care Special Coagulation/Hematology Laboratory (FAHC, Burlington, Vermont). They tested equal numbers of normal males and females (n=75 plasmas/gender) with 50 donors supplied from Precision Biologic and 25 donors drawn at FAHC. The reference ranges were calculated using the mean +/- 2SD.

#: van der Meer et al (1997) Thromb Haemost 78: 631-5.

‡: Range of thirty-two apparently healthy individuals recruited from hospital and university staff at Jagiellonian University Medical College, Krakow, Poland.
