# Supplementary material for: Defining the Boundaries of Normal Thrombin Generation: Investigations into Hemostasis
Source: PubMed Central journal article supplement (PMC3271084; doi:10.1371/journal.pone.0030385), 2012-02-02
Supplement: pone.0030385.s006.pdf [file pone.0030385.s006.pdf]

**Table S3:** Factor levels for control, hemophilia & warfarin groups (Mean  $\pm$  SD).

| <b>Protein Factor</b> | <b>Control*<br/>(%)</b> | <b>Hemophilia#<br/>(%)</b> | <b>Warfarin\$<br/>(%)</b> |
|-----------------------|-------------------------|----------------------------|---------------------------|
| VII                   | 108 $\pm$ 17            | 87 $\pm$ 29                | 30 $\pm$ 9                |
| X                     | 119 $\pm$ 21            | 110 $\pm$ 22               | 37 $\pm$ 10               |
| IX                    | 120 $\pm$ 20            | 107 $\pm$ 20               | 34 $\pm$ 7                |
| II                    | 111 $\pm$ 15            | 115 $\pm$ 15               | 29 $\pm$ 9                |
| VIII                  | 140 $\pm$ 27            | 0.4 $\pm$ 0.4              | 121 $\pm$ 29              |
| V                     | 109 $\pm$ 12            | 105 $\pm$ 20               | 105 $\pm$ 14              |
| TFPI                  | 114 $\pm$ 17            | 63 $\pm$ 12                | 111 $\pm$ 37              |
| AT                    | 100 $\pm$ 14            | 113 $\pm$ 11               | 104 $\pm$ 13              |

\*: Apparently healthy individuals (N=32).

#: Severe hemophilia A individuals (N=16), factor VIII levels  $\leq$  1% at the time of the blood draw.

\$: Warfarin treated individuals (N=65, INR=2.6  $\pm$  0.4).
