# Supplementary material for: Defining the Boundaries of Normal Thrombin Generation: Investigations into Hemostasis
Source: PubMed Central journal article supplement (PMC3271084; doi:10.1371/journal.pone.0030385), 2012-02-02
Supplement: pone.0030385.s007.pdf [file pone.0030385.s007.pdf]

**TABLE S4.** Hypothetical normal range plasma compositions resulting in extreme thrombin generation phenotypes. A rank ordering for each of the 6561 simulations for four metrics is shown with the combination of initial factor concentrations that produced them.

| <b>Time to 2nM IIa (min)</b> | <b>%VII</b> | <b>%X</b> | <b>%IX</b> | <b>%II</b> | <b>%VIII</b> | <b>%V</b> | <b>%TFPI</b> | <b>%AT</b> |
|------------------------------|-------------|-----------|------------|------------|--------------|-----------|--------------|------------|
| 2.30                         | 140         | 140       | 151        | 140        | 232          | 140       | 46           | 88         |
| 2.35                         | 140         | 100       | 151        | 140        | 232          | 140       | 46           | 88         |
| 2.38                         | 140         | 140       | 151        | 100        | 232          | 140       | 46           | 88         |
| 2.40                         | 140         | 140       | 151        | 140        | 232          | 100       | 46           | 88         |
| 2.42                         | 140         | 100       | 100        | 140        | 232          | 140       | 46           | 88         |
| ...                          | ...         | ...       | ...        | ...        | ...          | ...       | ...          | ...        |
| 14.03                        | 140         | 140       | 69         | 60         | 64           | 60        | 171          | 174        |
| 14.07                        | 60          | 60        | 69         | 60         | 64           | 60        | 171          | 174        |
| 14.30                        | 100         | 140       | 69         | 60         | 64           | 60        | 171          | 174        |
| 14.52                        | 60          | 100       | 69         | 60         | 64           | 60        | 171          | 174        |
| 14.97                        | 60          | 140       | 69         | 60         | 64           | 60        | 171          | 174        |

| <b>Peak IIa (nM)</b> | <b>%VII</b> | <b>%X</b> | <b>%IX</b> | <b>%II</b> | <b>%VIII</b> | <b>%V</b> | <b>%TFPI</b> | <b>%AT</b> |
|----------------------|-------------|-----------|------------|------------|--------------|-----------|--------------|------------|
| 792.4                | 140         | 60        | 151        | 140        | 232          | 60        | 46           | 88         |
| 790.9                | 140         | 60        | 151        | 140        | 232          | 100       | 46           | 88         |
| 789.8                | 100         | 60        | 151        | 140        | 232          | 60        | 46           | 88         |
| 789.4                | 140         | 60        | 151        | 140        | 232          | 140       | 46           | 88         |
| 788.1                | 100         | 60        | 151        | 140        | 232          | 100       | 46           | 88         |
| ...                  | ...         | ...       | ...        | ...        | ...          | ...       | ...          | ...        |
| 25.0                 | 140         | 140       | 69         | 60         | 64           | 60        | 171          | 174        |
| 24.7                 | 60          | 140       | 69         | 60         | 64           | 140       | 171          | 174        |
| 24.6                 | 100         | 140       | 69         | 60         | 64           | 60        | 171          | 174        |
| 24.4                 | 60          | 140       | 69         | 60         | 64           | 100       | 171          | 174        |
| 23.7                 | 60          | 140       | 69         | 60         | 64           | 60        | 171          | 174        |

| <b>Max Rate<br/>(nM/sec)</b> | <b>%VII</b> | <b>%X</b> | <b>%IX</b> | <b>%II</b> | <b>%VIII</b> | <b>%V</b> | <b>%TFPI</b> | <b>%AT</b> |
|------------------------------|-------------|-----------|------------|------------|--------------|-----------|--------------|------------|
| 12.4                         | 140         | 60        | 151        | 140        | 232          | 60        | 46           | 88         |
| 12.3                         | 140         | 60        | 151        | 140        | 232          | 100       | 46           | 88         |
| 12.2                         | 100         | 60        | 151        | 140        | 232          | 60        | 46           | 88         |
| 12.2                         | 140         | 60        | 151        | 140        | 232          | 140       | 46           | 88         |
| 12.1                         | 100         | 60        | 151        | 140        | 232          | 100       | 46           | 88         |
| ...                          | ...         | ...       | ...        | ...        | ...          | ...       | ...          | ...        |
| 0.112                        | 140         | 140       | 69         | 60         | 64           | 60        | 171          | 174        |
| 0.110                        | 100         | 140       | 69         | 60         | 64           | 60        | 171          | 174        |
| 0.107                        | 60          | 140       | 69         | 60         | 64           | 140       | 171          | 174        |
| 0.106                        | 60          | 140       | 69         | 60         | 64           | 100       | 171          | 174        |
| 0.103                        | 60          | 140       | 69         | 60         | 64           | 60        | 171          | 174        |

| <b>Total Ila<br/>(sec•nM)</b> | <b>%VII</b> | <b>%X</b> | <b>%IX</b> | <b>%II</b> | <b>%VIII</b> | <b>%V</b> | <b>%TFPI</b> | <b>%AT</b> |
|-------------------------------|-------------|-----------|------------|------------|--------------|-----------|--------------|------------|
| 134338                        | 140         | 60        | 151        | 140        | 232          | 60        | 46           | 88         |
| 134256                        | 100         | 60        | 151        | 140        | 232          | 60        | 46           | 88         |
| 134239                        | 140         | 60        | 151        | 140        | 232          | 100       | 46           | 88         |
| 134173                        | 140         | 60        | 151        | 140        | 232          | 140       | 46           | 88         |
| 134146                        | 100         | 60        | 151        | 140        | 232          | 140       | 46           | 88         |
| ...                           | ...         | ...       | ...        | ...        | ...          | ...       | ...          | ...        |
| 8966                          | 60          | 140       | 69         | 60         | 64           | 140       | 171          | 174        |
| 8843                          | 60          | 140       | 69         | 60         | 64           | 100       | 171          | 174        |
| 8734                          | 140         | 140       | 69         | 60         | 64           | 60        | 171          | 174        |
| 8594                          | 100         | 140       | 69         | 60         | 64           | 60        | 171          | 174        |
| 8179                          | 60          | 140       | 69         | 60         | 64           | 60        | 171          | 174        |
